# Supplementary material for: Whole-Genome Analysis of Porcine Circovirus Type 2 in Russia
Source: MDPI journal article supplement (doi:10.3390/pathogens10121631), 2021-12-16
Supplement: s1 [file s1]

**Table S1.** Supplementary. PCV2 strains from Russia used in this study.

| №  | PCV2 strain       | Year of isolation | Region of Russia | Genotype | Genome size, nt | ORF2 size, nt | GenBank accession number | Health status | Age            | Sample             | Number of samples used |
|----|-------------------|-------------------|------------------|----------|-----------------|---------------|--------------------------|---------------|----------------|--------------------|------------------------|
| 1  | Belgorod_M_18     | 2018              | Belgorod         | 2d       | 1767            | 705           | MZ511702                 | PDNS          | fattening pigs | tissue homogenates | 13                     |
| 2  | Belgorod_RA18     | 2018              | Belgorod         | 2a       | 1757            | 702           | MZ511700                 | Non-reported  | fattening pigs | tissue homogenates | 20                     |
| 3  | Burytia2018       | 2018              | Burytia          | 2d       | 1767            | 705           | MZ511694                 | Non-reported  | growing pigs   | tissue homogenates | 2                      |
| 4  | Krasnoyarskiy2018 | 2018              | Krasnoyarskiy    | 2d       | 1767            | 705           | MZ511703                 | PDNS          | fattening pigs | tissue homogenates | 10                     |
| 5  | Tomskaya18        | 2018              | Tomskaya         | 2d       | 1767            | 705           | MZ511698                 | Non-reported  | fattening pigs | tissue homogenates | 4                      |
| 6  | Smolenskaya2018   | 2018              | Smolenskaya      | 2d       | 1767            | 705           | MZ511697                 | Non-reported  | growing pigs   | tissue homogenates | 6                      |
| 7  | Sverdlovskaya18   | 2018              | Sverdlovskaya    | 2d       | 1767            | 705           | MZ511696                 | PDNS          | fattening pigs | tissue homogenates | 4                      |
| 8  | Vologodskaya2018  | 2018              | Vologodskaya     | 2b       | 1767            | 702           | MZ511695                 | Non-reported  | suckling pigs  | tissue homogenates | 5                      |
| 9  | Kemerovo_Ch_522   | 2019              | Kemerovo         | 2d       | 1767            | 705           | MZ511693                 | PDNS          | growing pigs   | serum              | 8                      |
| 10 | Kemerovo_Sl_809   | 2019              | Kemerovo         | 2d       | 1767            | 705           | MZ511691                 | PDNS          | fattening pigs | serum              | 30                     |
|    | Kemerovo_Sl_1405  | 2019              | Kemerovo         | 2d       | 1767            | 705           | MZ511692                 | PDNS          | fattening pigs | serum              | 30                     |
| 12 | Moskovskaya_2020  | 2020              | Moskovskaya      | 2d       | 1767            | 705           | MZ511701                 | Non-reported  | growing pigs   | serum              | 13                     |
| 13 | Ryazanskaya_2020  | 2020              | Ryazanskaya      | 2d       | 1767            | 705           | MZ511699                 | Non-reported  | fattening pigs | tissue homogenates | 5                      |
| 14 | Kurskaya_2020     | 2020              | Kurskaya         | 2d       | 1767            | 705           | MZ511704                 | Non-reported  | fattening pigs | tissue homogenates | 5                      |
